# Supplementary material
Source: PubMed Central journal article supplement (PMC4433622)

## Supplementary Figure S1

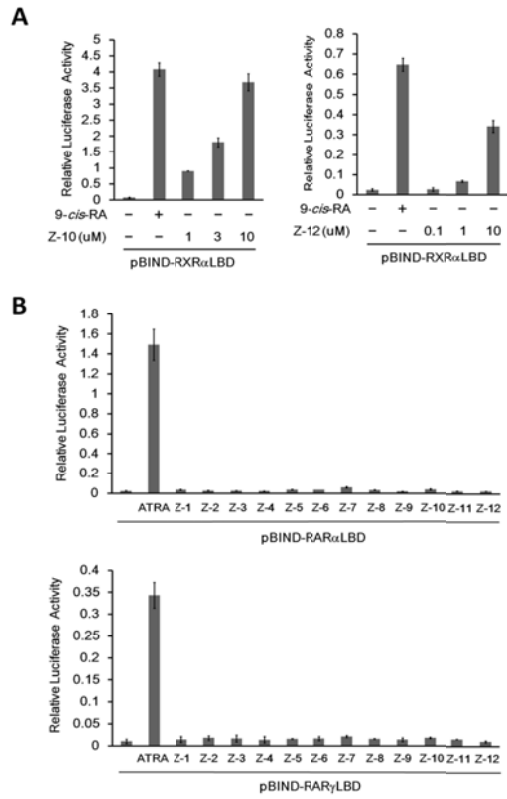

## Supplementary Figure S2

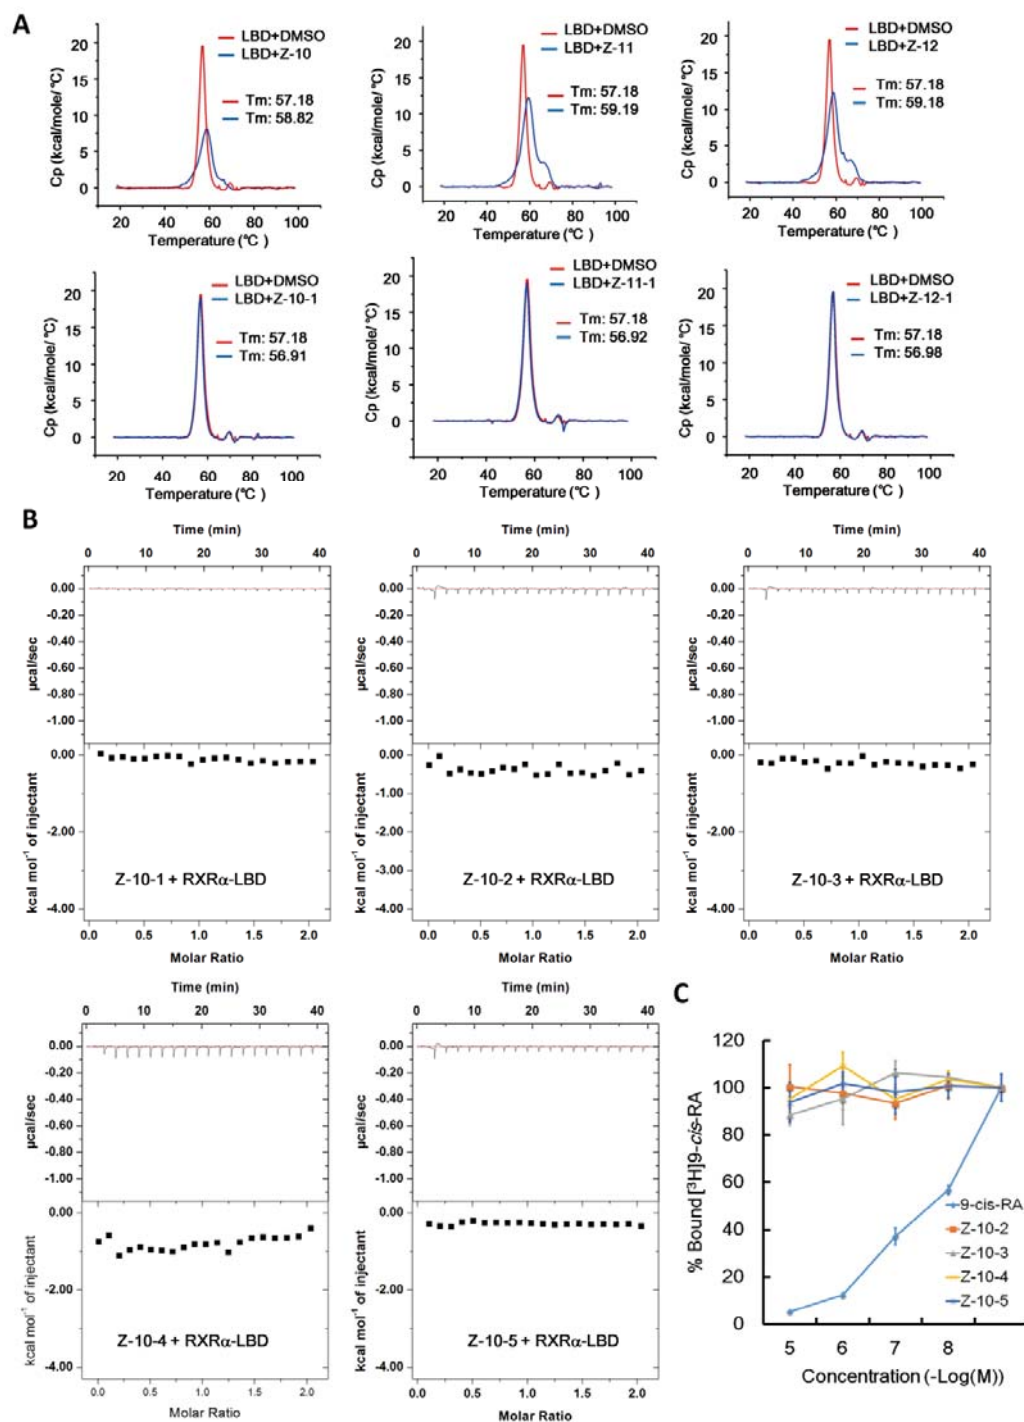

### Supplementary Figure S3

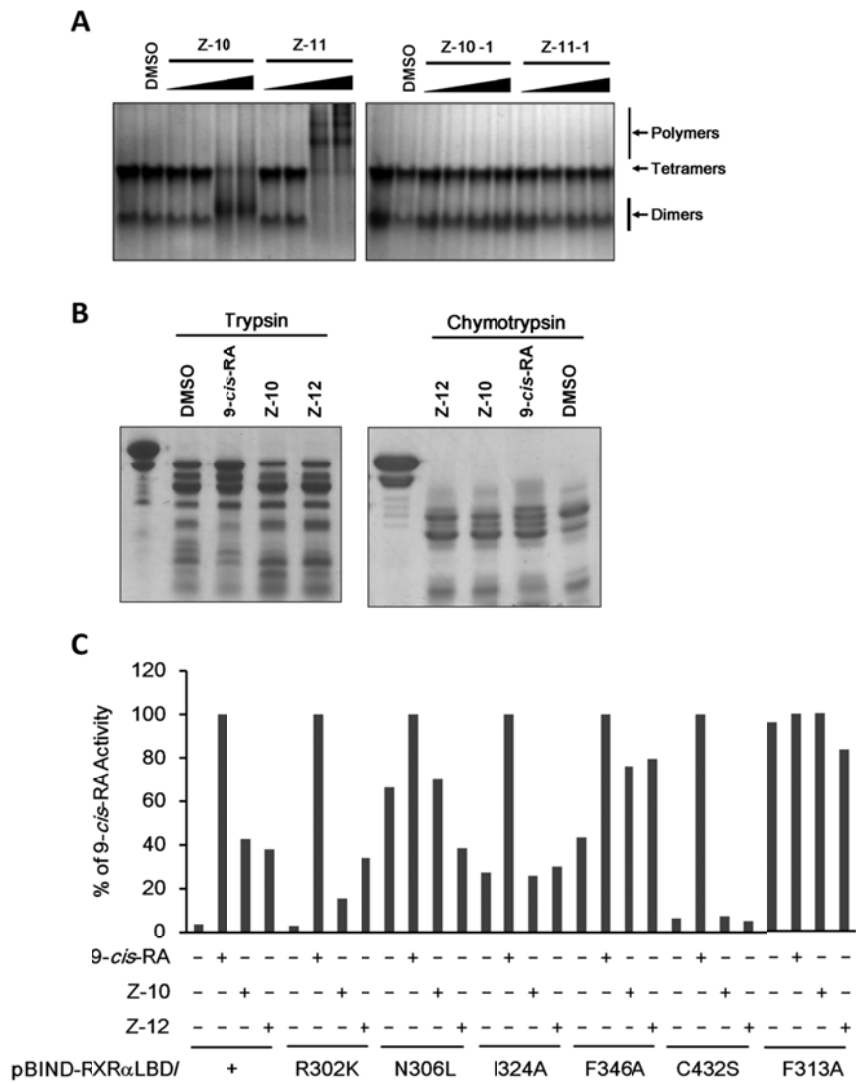

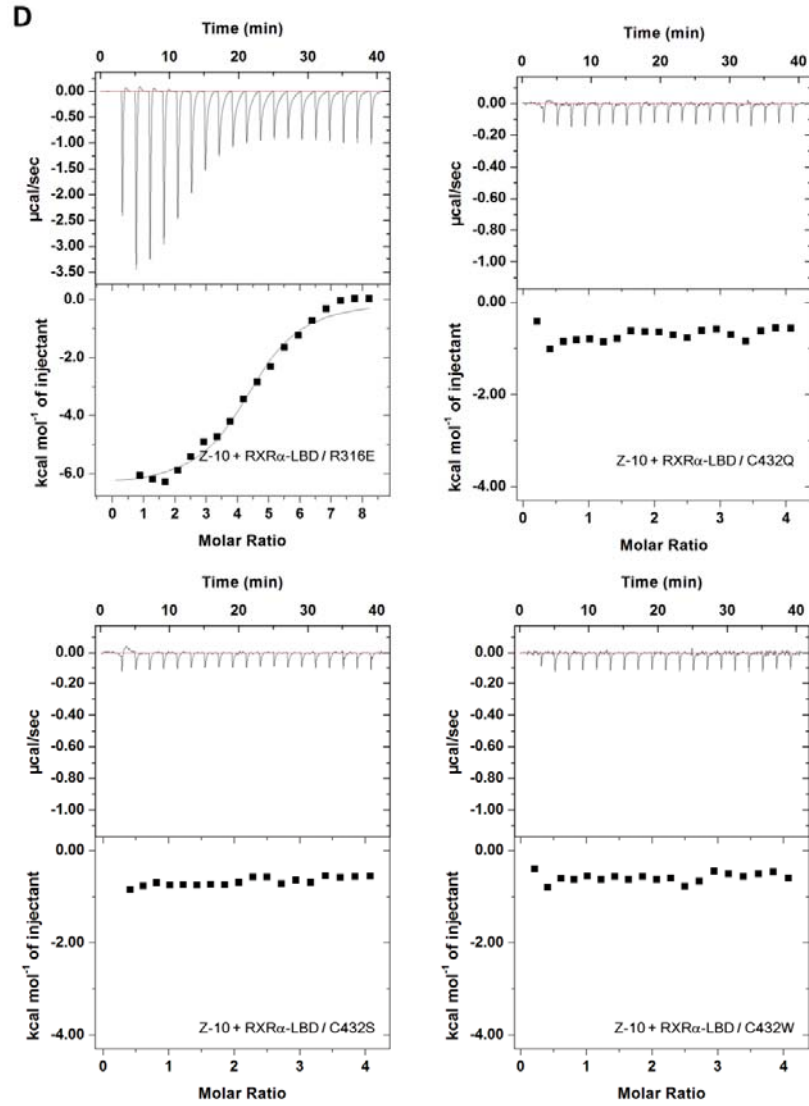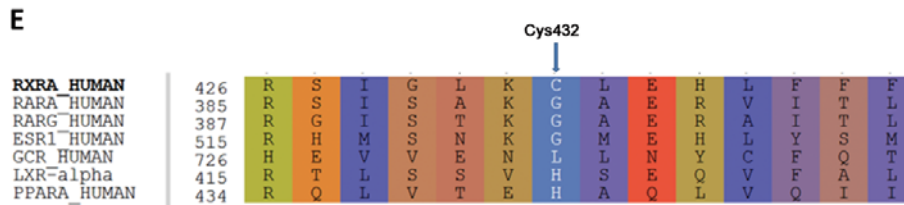

## Supplementary Figure S4

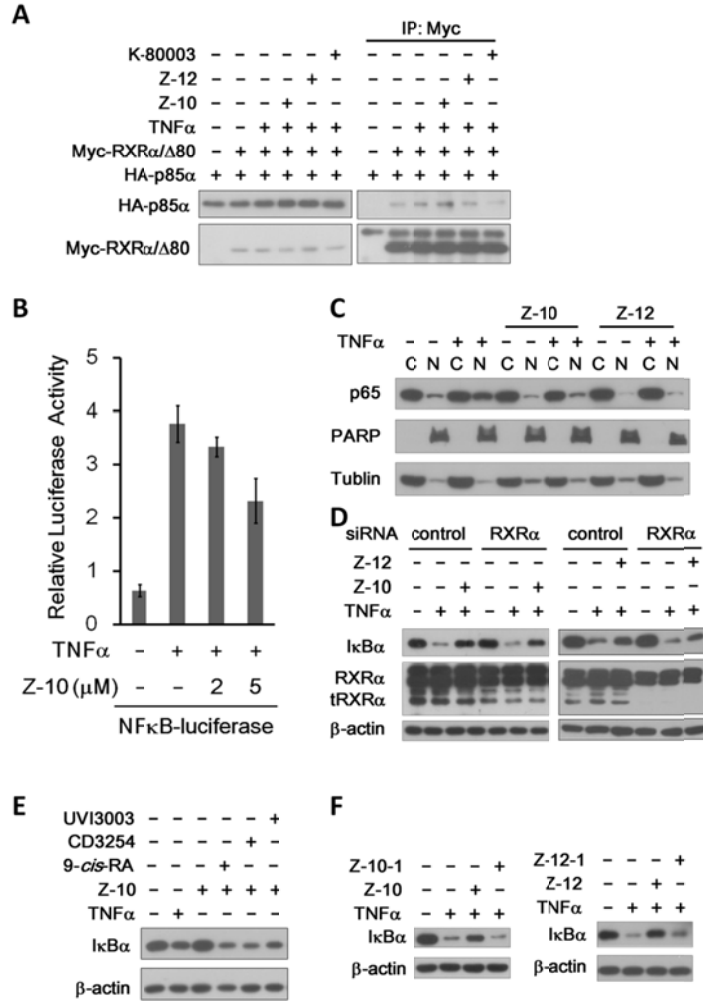

Supplementary Figure S5

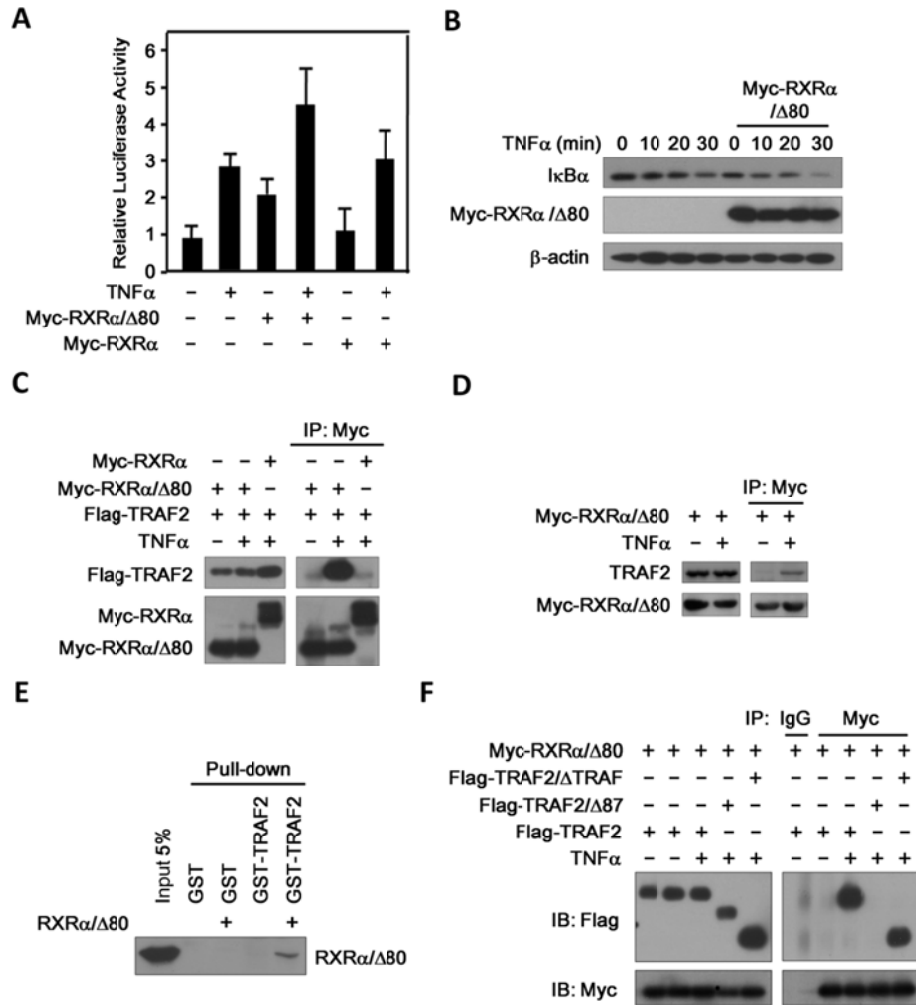

Supplementary Figure S6

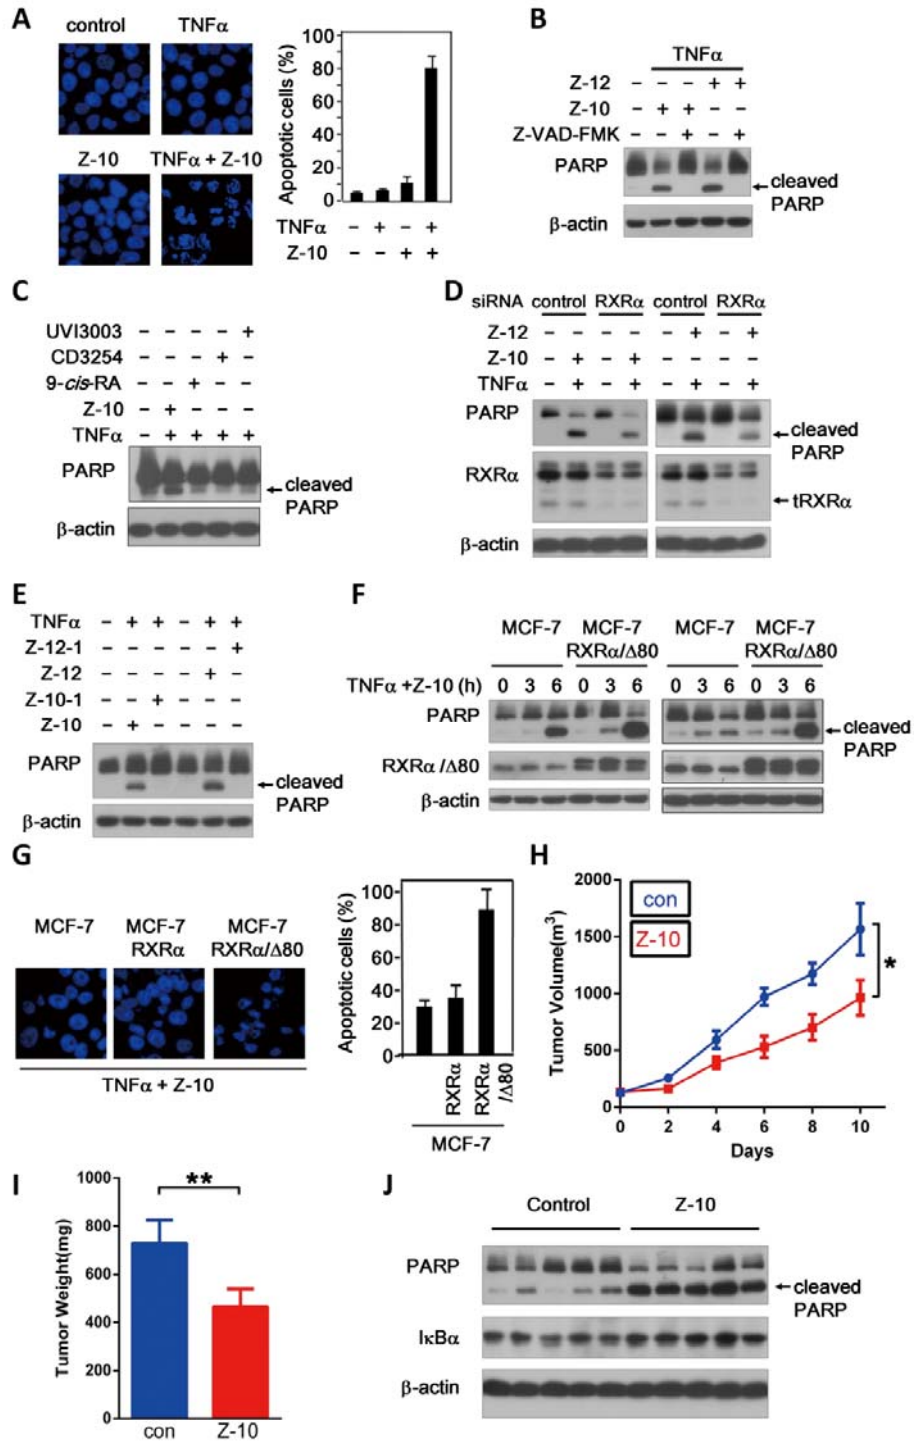

Supplement: NIHMS674177-supplement-4.pdf [file NIHMS674177-supplement-4.pdf]
